# Supplementary material for: An experimental and theoretical exploration of supramolecular interactions and photoresponse properties of two Ni(ii) complexes
Source: Royal Society of Chemistry journal article supplement (doi:10.1039/d1nj01363g), 2021-01-01
Supplement: d1nj01363g1.pdf [file d1nj01363g1.pdf]

## Supporting Information

# Experimental and theoretical exploration of supramolecular interactions and photoresponse properties of two Ni(II) complexes

Samit Pramanik<sup>a</sup>, Sudipta Pathak<sup>b</sup>, Sumanta Jana<sup>a</sup>, Monotosh Mondal<sup>b</sup>, Antonio Frontera<sup>\*,c</sup>, Subrata Mukhopadhyay<sup>\*,a</sup>

<sup>a</sup>Department of Chemistry, Jadavpur University, Kolkata 700032, India

<sup>b</sup>Department of Chemistry, Haldia Government College, Debhog, Purba Medinipur, West Bengal, India

<sup>c</sup>Departament de Química, Universitat de les Illes Balears, Crta. de Valldemossa km 7.5, 07122 Palma de Mallorca (Balears), Spain

Table of Contents:

| Sl. No. | Contents                                                                                                                                      | Page No. |
|---------|-----------------------------------------------------------------------------------------------------------------------------------------------|----------|
| 1.      | Table S1. Crystal Data and Structure Refinement Parameters for complex <b>1</b> and <b>2</b>                                                  | 2        |
| 2.      | Table S2. Selected Bond Distances [Å] for complex <b>1</b> and <b>2</b>                                                                       | 3        |
| 3.      | Table S3. Selected Bond Angles [°] for complex <b>1</b> and <b>2</b>                                                                          | 3        |
| 4.      | Table S4. Geometrical Parameters for the Hydrogen Bonds of complex <b>1</b> and <b>2</b>                                                      | 4        |
| 5.      | Table S5. Geometrical Parameters (Å, °) for the $\pi$ -Stacking Interactions for the Title Complexes                                          | 4        |
| 6.      | Table S6. Geometrical Parameters (Å, °) for the C-H $\cdots\pi$ Interactions for the complex <b>2</b>                                         | 5        |
| 7.      | Table S7. Geometrical Parameters (Å, °) for the Anion $\cdots\pi$ Interactions for the Title complexes                                        | 5        |
| 8.      | Scheme 1. Schematic representations of the synthesis of complex <b>1</b> and <b>2</b>                                                         | 6        |
| 9.      | Figure S1. Asymmetric unit of complex <b>1</b>                                                                                                | 7        |
| 10.     | Figure S2. Asymmetric unit of complex <b>2</b>                                                                                                | 7        |
| 11.     | Figure S3. FT-IR spectra for complex <b>1</b> and <b>2</b>                                                                                    | 7        |
| 12.     | Fig. S4 1-D polymeric chain through a $\pi\cdots\pi$ interaction                                                                              | 8        |
| 13.     | Fig. S5 Perspective view of the extended supramolecular networks in complex <b>1</b> through $\pi\cdots\pi$ and $\pi\cdots\pi^+$ interactions | 8        |
| 14.     | Fig. S6 Propagation 1-D of polymeric chain through $\pi\cdots\pi$ / lone pair $\cdots\pi$ / hydrogen bonding interactions in complex <b>1</b> | 8        |
| 15.     | Fig. S7 1-D polymeric chain through a $\pi\cdots\pi$ interaction in complex <b>2</b>                                                          | 9        |
| 16.     | Fig. S8 Perspective view of 2-D layer incorporating anion $\cdots\pi$ and anion $\cdots\pi^+$ interactions in complex <b>2</b>                | 9        |
| 17.     | Fig. S9 One-dimensional (1-D) zigzag polymeric chain through hydrogen bonding interactions in complex <b>2</b>                                | 9        |
| 18.     | Table S8. Device parameter for <b>1</b>                                                                                                       | 10       |
| 19.     | Table S9 Device parameter for <b>2</b>                                                                                                        | 10       |
| 20.     | Fig. S10 Capacitance vs. Frequency plot of (a) device 1 and (b) device 2                                                                      | 10       |
| 21.     | Table S10 Conductivity data reported for single crystals of Ni-based complexes                                                                | 11       |
| 22.     | References                                                                                                                                    | 11       |

**Table S1. Crystal Data and Structure Refinement Parameters for Complex 1 and 2**

| Complex                                                                                                                                                                                                                                                                                                                                              | <b>1</b> (2052738)                                                | <b>2</b> (2052737)                                                                |
|------------------------------------------------------------------------------------------------------------------------------------------------------------------------------------------------------------------------------------------------------------------------------------------------------------------------------------------------------|-------------------------------------------------------------------|-----------------------------------------------------------------------------------|
| Empirical formula                                                                                                                                                                                                                                                                                                                                    | C <sub>32</sub> H <sub>22</sub> N <sub>8</sub> NiClO <sub>9</sub> | C <sub>36</sub> H <sub>28</sub> N <sub>12</sub> NiF <sub>24</sub> OP <sub>4</sub> |
| Formula Weight                                                                                                                                                                                                                                                                                                                                       | 757.72                                                            | 1283.27                                                                           |
| Temperature (K)                                                                                                                                                                                                                                                                                                                                      | 273(2)                                                            | 273(2)                                                                            |
| Wavelength (Å)                                                                                                                                                                                                                                                                                                                                       | 0.71073                                                           | 0.71073                                                                           |
| Crystal system                                                                                                                                                                                                                                                                                                                                       | Triclinic                                                         | Triclinic                                                                         |
| space group                                                                                                                                                                                                                                                                                                                                          | <i>P</i> -1                                                       | <i>P</i> -1                                                                       |
| a, b, c (Å)                                                                                                                                                                                                                                                                                                                                          | 8.4334(14), 13.968(2),<br>18.311(3)                               | 9.0874(14), 9.5574(16),<br>28.115(4)                                              |
| α, β, γ (°)                                                                                                                                                                                                                                                                                                                                          | 102.822(5), 101.380(5),<br>94.631(4)                              | 83.970(4), 86.039(4), 88.258(4)                                                   |
| Volume (Å <sup>3</sup> )                                                                                                                                                                                                                                                                                                                             | 2044.3(6)                                                         | 2421.8(7)                                                                         |
| Z / Density (calc.) (Mg/m <sup>3</sup> )                                                                                                                                                                                                                                                                                                             | 2 / 1.231                                                         | 2 / 1.760                                                                         |
| Absorption coefficient (mm <sup>-1</sup> )                                                                                                                                                                                                                                                                                                           | 0.595                                                             | 0.673                                                                             |
| F(000)                                                                                                                                                                                                                                                                                                                                               | 776                                                               | 1280                                                                              |
| Crystal size (mm <sup>3</sup> )                                                                                                                                                                                                                                                                                                                      | 0.18 × 0.25 × 0.3                                                 | 0.18 × 0.25 × 0.3                                                                 |
| θ range for data collection                                                                                                                                                                                                                                                                                                                          | 2.122 to 27.170                                                   | 2.143 to 27.133                                                                   |
| Completeness to θ (%)                                                                                                                                                                                                                                                                                                                                | 100%                                                              | 100%                                                                              |
| Absorption correction                                                                                                                                                                                                                                                                                                                                | EMPIRICAL                                                         | EMPIRICAL                                                                         |
| Max. and min. transmission                                                                                                                                                                                                                                                                                                                           | 0.898 and 0.837                                                   | 0.886 and 0.817                                                                   |
| Refinement method                                                                                                                                                                                                                                                                                                                                    | Full-matrix least-squares on F <sup>2</sup>                       | Full-matrix least-squares on F <sup>2</sup>                                       |
| Data/parameters                                                                                                                                                                                                                                                                                                                                      | 9047 / 465                                                        | 10688 / 706                                                                       |
| Goodness-of-fit on F <sup>2</sup>                                                                                                                                                                                                                                                                                                                    | 1.089                                                             | 1.049                                                                             |
| Final R indices [I > 2σ(I)]                                                                                                                                                                                                                                                                                                                          | R <sub>1</sub> = 0.0715, wR <sub>2</sub> = 0.2167                 | R <sub>1</sub> = 0.0883, wR <sub>2</sub> = 0.2395                                 |
| R indices (all data)                                                                                                                                                                                                                                                                                                                                 | R <sub>1</sub> = 0.0897, wR <sub>2</sub> = 0.2294                 | R <sub>1</sub> = 0.1171, wR <sub>2</sub> = 0.2647                                 |
| Largest diff. peak and hole (e.Å <sup>-3</sup> )                                                                                                                                                                                                                                                                                                     | 0.931 and -0.920                                                  | 0.901 and -0.876                                                                  |
| $R_1 = \frac{\sum   F_o  -  F_c  }{\sum  F_o }$ , $wR_2 = \frac{[\sum \{(F_o^2 - F_c^2)^2\} / \sum \{w(F_o^2)^2\}]^{1/2}}{w}$ $w = 1 / \{\sigma^2(F_o^2) + (aP)^2 + bP\}$ where, P = (F <sub>o</sub> <sup>2</sup> + 2F <sub>c</sub> <sup>2</sup> )/3,<br>a = 0.1176; b = 2.4644 for complex <b>1</b> and a = 0.1206; b = 7.4829 for complex <b>2</b> |                                                                   |                                                                                   |

**Table S2. Selected Bond Distances [Å] for Complex 1 and 2**

|           | <b>Bonds</b> | <b>Distance (Å)</b> | <b>Bonds</b> | <b>Distance (Å)</b> |
|-----------|--------------|---------------------|--------------|---------------------|
| Complex 1 | Ni1–O1       | 2.170(3)            | Ni1–N13      | 2.140(3)            |
|           | Ni1–O12      | 2.109(3)            | Ni1–N30      | 1.974(3)            |
|           | Ni1–N9       | 1.960(3)            | Ni1–N36      | 2.117(3)            |
| Complex 2 | Ni1–N1       | 2.156(5)            | Ni1–N25      | 2.159(5)            |
|           | Ni1–N18      | 1.995(4)            | Ni1–N36      | 1.990(4)            |
|           | Ni1–N24      | 2.177(4)            | Ni1–N47      | 2.149(5)            |

**Table S3. Selected Bond Angles [°] for Complex 1 and 2**

|             | <b>Bond angles</b> | <b>Value (°)</b> | <b>Bond angles</b> | <b>Value (°)</b> |
|-------------|--------------------|------------------|--------------------|------------------|
| Complex 1   | O1–Ni1–O12         | 155.94(11)       | N13–Ni1–N36        | 154.40(13)       |
|             | O1–Ni1–N9          | 77.42(12)        | N30–Ni1–N36        | 77.29(13)        |
|             | O1–Ni1–N13         | 91.92(11)        | Ni1–O1–C2          | 112.4(3)         |
|             | O1–Ni1–N30         | 102.46(12)       | Ni1–O12–C10        | 114.1(3)         |
|             | O1–Ni1–N36         | 92.71(11)        | Ni1–N9–C8          | 118.7(3)         |
|             | O12–Ni1–N9         | 78.52(12)        | Ni1–N9–C4          | 119.5(2)         |
|             | O12–Ni1–N13        | 94.04(12)        | Ni1–N13–C14        | 128.0(3)         |
|             | O12–Ni1–N30        | 101.59(12)       | Ni1–N13–C18        | 114.5(3)         |
|             | O12–Ni1–N36        | 91.91(13)        | Ni1–N30–C19        | 121.0(3)         |
|             | N9–Ni1–N13         | 103.44(13)       | Ni1–N30–C29        | 120.5(3)         |
|             | N9–Ni1–N30         | 179.41(14)       | Ni1–N36–C31        | 114.1(2)         |
|             | N9–Ni1–N36         | 102.14(13)       | Ni1–N36–C35        | 127.7(3)         |
|             | N13–Ni1–N30        | 77.13(13)        |                    |                  |
|             | Complex 2          | N1–Ni1–N18       | 76.84(17)          | N36–Ni1–N47      |
| N1–Ni1–N24  |                    | 152.65(16)       | Ni1–N1–C2          | 128.0(4)         |
| N1–Ni1–N25  |                    | 92.41(16)        | Ni1–N1–C6          | 113.8(3)         |
| N1–Ni1–N36  |                    | 103.10(17)       | Ni1–N18–C17        | 121.3(3)         |
| N1–Ni1–N47  |                    | 92.73(18)        | Ni1–N18–C7         | 120.1(3)         |
| N18–Ni1–N24 |                    | 75.86(15)        | Ni1–N24–C19        | 114.5(3)         |
| N18–Ni1–N25 |                    | 106.29(17)       | Ni1–N24–C23        | 128.4(3)         |
| N18–Ni1–N36 |                    | 177.48(18)       | Ni1–N25–C26        | 127.9(4)         |
| N18–Ni1–N47 |                    | 100.83(18)       | Ni1–N25–C30        | 114.4(3)         |
| N24–Ni1–N25 |                    | 93.64(16)        | Ni1–N36–C31        | 121.7(4)         |
| N24–Ni1–N36 |                    | 104.24(16)       | Ni1–N36–C41        | 121.0(4)         |
| N24–Ni1–N47 |                    | 93.93(17)        | Ni1–N47–C46        | 127.8(4)         |
| N25–Ni1–N36 |                    | 76.23(17)        | Ni1–N47–C42        | 114.3(4)         |
| N25–Ni1–N47 |                    | 152.86(17)       |                    |                  |

**Table S4. Geometrical Parameters for the Hydrogen Bonds of Complex 1 and 2**

|               | D–H···A        | D–H [Å] | H···A    | D···A [Å] | D–H···A [°]  | Symmetry      |
|---------------|----------------|---------|----------|-----------|--------------|---------------|
| Complex 1     | N27–H27···O49  | 0.8600  | 2.3100   | 3.111(6)  | 155.00       | x, y, -1+z    |
|               | O37–H37···O11  | 0.8200  | 1.8000   | 2.598(6)  | 164.00       | –             |
|               | O49–H49B···Cl1 | 0.8500  | 2.2100   | 3.010(6)  | 157.00       | –             |
|               | C5–H5···O48    | 0.9300  | 2.4300   | 3.286(7)  | 154.00       | -1+x, 1+y, z  |
|               | C14–H14···O39  | 0.9300  | 2.5100   | 3.212(7)  | 133.00       | 1-x, 1-y, 1-z |
|               | C23–H23···Cl1  | 0.9300  | 2.3900   | 3.230(7)  | 150.00       | -1+x, y, -1+z |
|               | C25–H25···O47  | 0.9300  | 2.2900   | 3.127(6)  | 149.00       | -1+x, y, -1+z |
|               | C26–H26···O1   | 0.9300  | 2.5400   | 3.325(8)  | 142.00       | 1-x, 1-y, -z  |
|               | C35–H35···N45  | 0.9300  | 2.4900   | 3.362(5)  | 157.00       | 2-x, 1-y, 1-z |
| C43–H43···O3  | 0.9300         | 2.5800  | 3.412(7) | 149.00    | 1+x, -1+y, z |               |
| Complex 2     | O2–H2B···F10   | 0.8500  | 2.4100   | 2.995(8)  | 127.00       | –             |
|               | O2–H2B···F12   | 0.8500  | 2.3700   | 2.990(8)  | 130.00       | –             |
|               | N15–H15···O2   | 0.8600  | 1.9200   | 2.717(8)  | 154.00       | –             |
|               | C2–H2···F6     | 0.9300  | 2.5300   | 3.444(13) | 167.00       | 1-x, 1-y, 1-z |
|               | C13–H13···F13  | 0.9300  | 2.5400   | 3.166(8)  | 124.00       | -x, -y, 1-z   |
|               | C14–H14···F18  | 0.9300  | 2.4900   | 3.286(9)  | 143.00       | -x, -y, 1-z   |
|               | C38–H38···F1   | 0.9300  | 2.2000   | 3.08(2)   | 157.00       | x, y, -1+z    |
|               | C39–H39···F4   | 0.9300  | 2.5400   | 3.252(16) | 133.00       | x, y, -1+z    |
|               | C44–H44···F6   | 0.9300  | 2.5100   | 3.400(14) | 161.00       | -x, 1-y, 1-z  |
|               | C45–H45···F17  | 0.9300  | 2.4500   | 3.089(10) | 126.00       | –             |
| C46–H46···F15 | 0.9300         | 2.5300  | 3.431(8) | 164.00    | –            |               |

**Table S5. Geometrical Parameters (Å, °) for the  $\pi$ -Stacking Interactions for the Title Complexes**

|           | Cg(i)···Cg(j)     | Cg(i)···Cg(j)<br>[Å] | $\alpha$ (°) | $\beta$ (°) | $\gamma$ (°) | Cg(i)–<br>perp[Å] | Cg(j)–<br>perp[Å] | Symmetry      |
|-----------|-------------------|----------------------|--------------|-------------|--------------|-------------------|-------------------|---------------|
| Complex 1 | Cg(5)[1]···Cg(10) | 3.764(3)             | 7.54         | 27.86       | 23.34        | 3.456             | 3.327             | 2-x, 1-y, 1-z |
|           | Cg(6)[1]···Cg(9)  | 3.715(3)             | 2.46         | 18.70       | 19.80        | 3.495             | 3.519             | -1+x, y, z    |
|           | Cg(8)[1]···Cg(9)  | 3.561(3)             | 2.35         | 13.85       | 15.89        | 3.425             | 3.458             | 1-x, 1-y, -z  |
|           | Cg(9)[1]···Cg(6)  | 3.715(3)             | 2.46         | 19.80       | 18.70        | 3.518             | 3.495             | 1+x, y, z     |
|           | Cg(9)[1]···Cg(8)  | 3.561(3)             | 2.35         | 15.89       | 13.85        | 3.458             | 3.425             | 1-x, 1-y, -z  |
|           | Cg(10)[2]···Cg(5) | 3.765(3)             | 7.54         | 23.34       | 27.86        | 3.328             | 3.456             | 2-x, 1-y, 1-z |
| Complex 2 | Cg(7)[1]···Cg(7)  | 3.635(4)             | 0.04         | 14.69       | 14.69        | 3.516             | 3.516             | 1-x, -y, 1-z  |
|           | Cg(9)[1]···Cg(12) | 3.957(3)             | 4.24         | 29.07       | 24.83        | 3.591             | 3.458             | 1+x, y, z     |
|           | Cg(12)[1]···Cg(9) | 3.956(3)             | 4.24         | 24.83       | 29.07        | 3.458             | 3.591             | -1+x, y, z    |

**Table S6. Geometrical Parameters (Å, °) for the C–H···π Interactions for the Complex 2**

|           | X–H(I)···Cg(J)       | H···Cg | X···Cg   | X–H···Cg | Symmetry   |
|-----------|----------------------|--------|----------|----------|------------|
| Complex 2 | C(4)–H(4)[1]···Cg(9) | 2.82   | 3.738(7) | 169      | x, -1+y, z |

For complex 2: Cg(9) is the centroid of [N25/C26/C27/C28/C29/C30] ring.

**Table S7 Geometrical Parameters (Å, °) for the Anion···π Interactions for the Title Complexes**

|           | Y–X(I)···Cg(J)         | X···Cg [Å] | Y···Cg [Å] | Y–X···Cg (°) | Symmetry      |
|-----------|------------------------|------------|------------|--------------|---------------|
| Complex 1 | C(10)–O(11)[1]···Cg(5) | 3.493(4)   | 4.090(5)   | 110.2(3)     | 1-x, 1-y, 1-z |
|           | C(38)–O(39)[2]···Cg(1) | 3.989(6)   | 4.734(5)   | 123.1(5)     | 1-x, 1-y, 1-z |
|           | C(38)–O(39)[2]···Cg(5) | 3.918(7)   | 4.152(6)   | 93.2(4)      | 1-x, 1-y, 1-z |
|           | C(46)–O(47)[2]···Cg(1) | 3.546(5)   | 4.031(5)   | 105.4(3)     | 2-x, 1-y, 1-z |
| Complex 2 | P(2)–F(9)[3]···Cg(8)   | 3.329(8)   | 4.462(3)   | 128.0(4)     | 1-x, 1-y, 1-z |
|           | P(3)–F(15)[4]···Cg(6)  | 2.999(5)   | 4.337(2)   | 140.6(3)     | x, y, z       |
|           | P(3)–F(17)[4]···Cg(1)  | 3.743(6)   | 4.693(3)   | 118.3(3)     | -1+x, y, z    |
|           | P(3)–F(17)[4]···Cg(5)  | 3.316(6)   | 4.419(3)   | 125.9(3)     | -1+x, y, z    |
|           | P(3)–F(18)[4]···Cg(7)  | 3.282(7)   | 4.611(3)   | 142.6(4)     | x, y, z       |
|           | P(4)–F(19)[5]···Cg(5)  | 3.747(9)   | 4.485(3)   | 108.3(4)     | x, 1+y, z     |
|           | P(4)–F(22)[5]···Cg(5)  | 3.636(8)   | 4.485(3)   | 112.7(3)     | x, 1+y, z     |
|           | P(4)–F(22)[5]···Cg(10) | 3.012(7)   | 4.086(3)   | 122.9(3)     | x, y, z       |
|           | P(4)–F(23)[5]···Cg(12) | 3.203(7)   | 4.203(3)   | 119.7(4)     | x, 1+y, z     |
|           | P(4)–F(24)[5]···Cg(10) | 3.454(7)   | 4.086(3)   | 102.2(3)     | x, y, z       |

Cg(j) denotes centroid of j<sup>th</sup> ring of the title complexes. For complex 1: Cg(1) is the centroid of [Ni1/O1/C2/C4/N9] ring; and Cg(5) is the centroid of [N9/C4/C5/C6/C7/C8] ring. For complex 2: Cg(1) is the centroid of [Ni1/N1//C6/C7/N18] ring; Cg(5) is the centroid of [N1/C2/C3/C4/C5/C6] ring; Cg(6) is the centroid of [N8/C7/N18/C17/N16/C9] ring; Cg(7) is the centroid of [N15/C10/C11/C12/C13/C14] ring; Cg(8) is the centroid of [N24/C19/C20/C21/C22/C23] ring; Cg(10) is the centroid of [N32/C31/N36/C41/N40/C33] ring; and Cg(12) is the centroid of [N47/C42/C43/C44/C45/C46] ring.

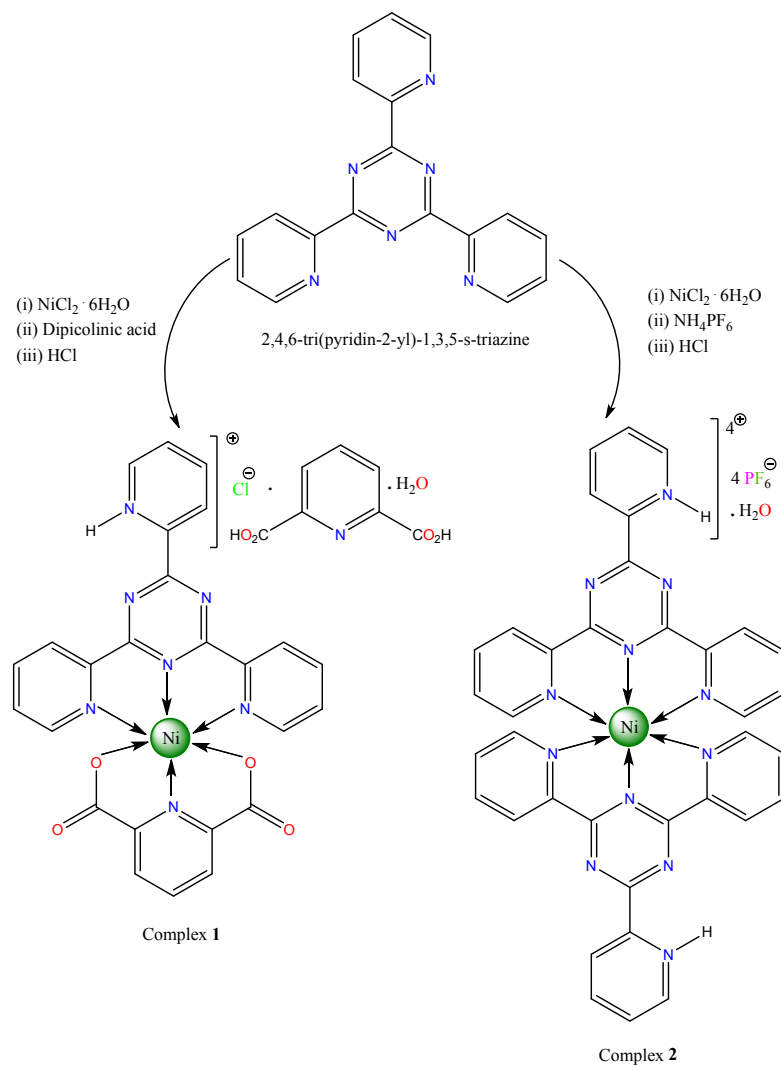

**Scheme 1** Schematic representations of the synthesis of complex 1 and 2

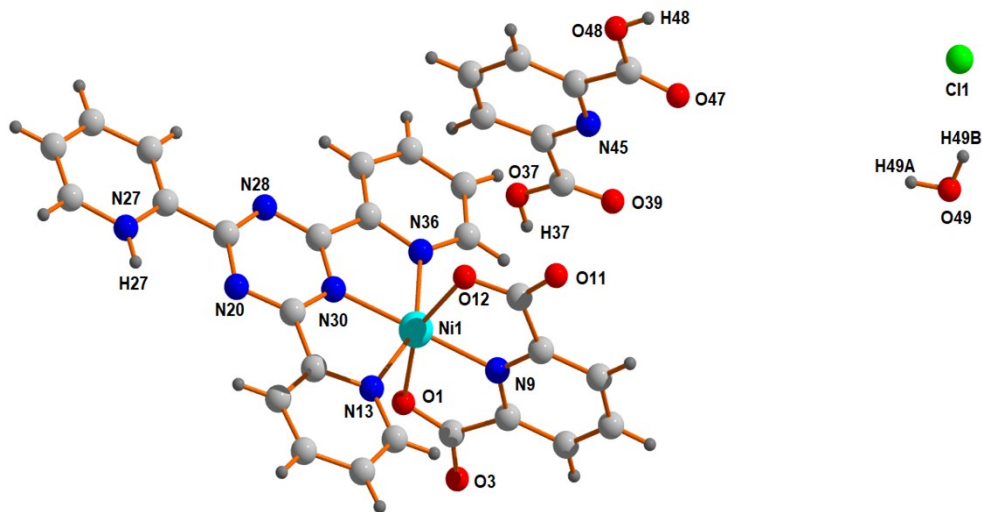

Fig. S1. Asymmetric unit of complex 1

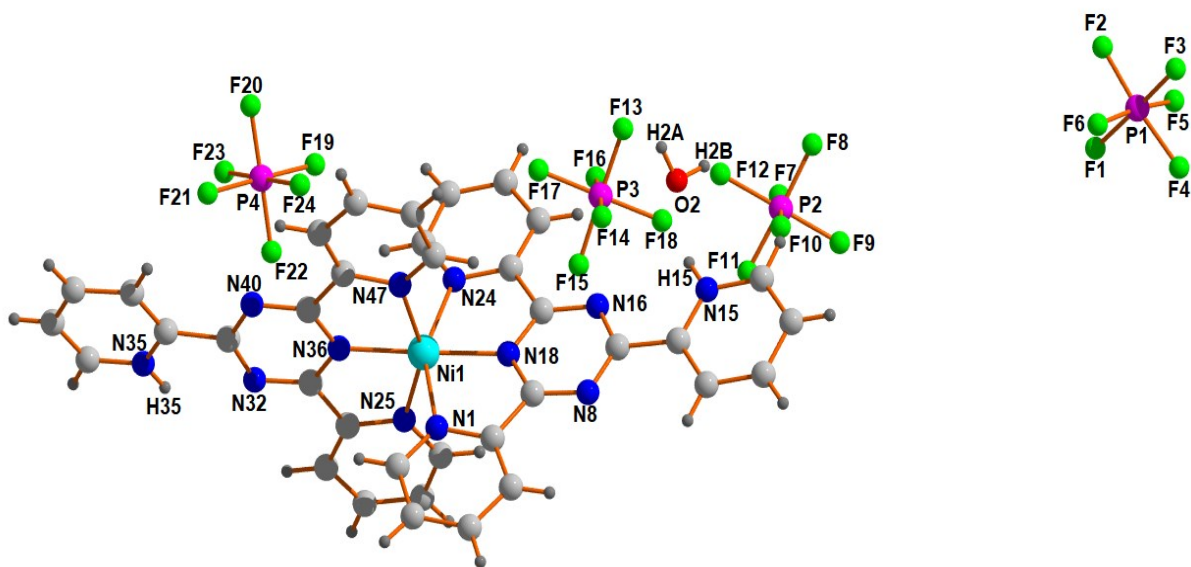

Fig. S2 Asymmetric unit of complex 2

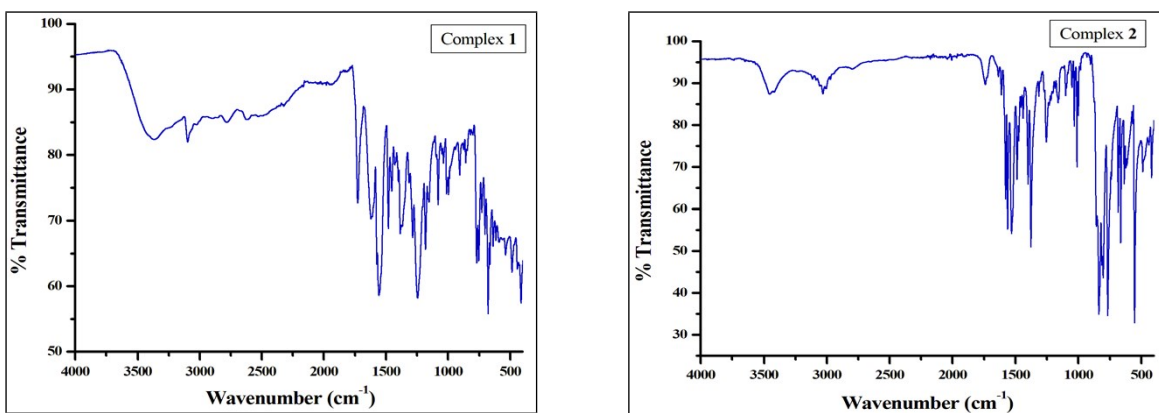

Fig. S3. FT-IR spectra for Complex 1 and Complex 2

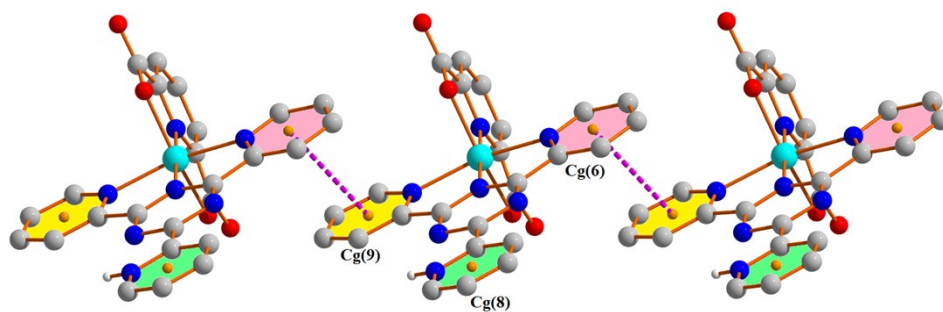

**Fig. S4** 1D polymeric chain through a  $\pi \cdots \pi$  interaction (aromatic hydrogen atoms have been omitted for clarity).

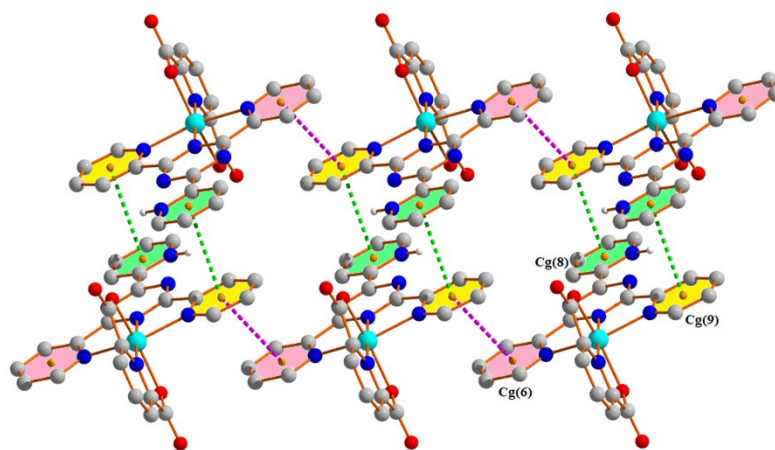

**Fig. S5** Perspective view of the extended supramolecular networks in complex **1** through  $\pi \cdots \pi$  and  $\pi \cdots \pi^+$  interactions (aromatic hydrogen atoms have been omitted for clarity).

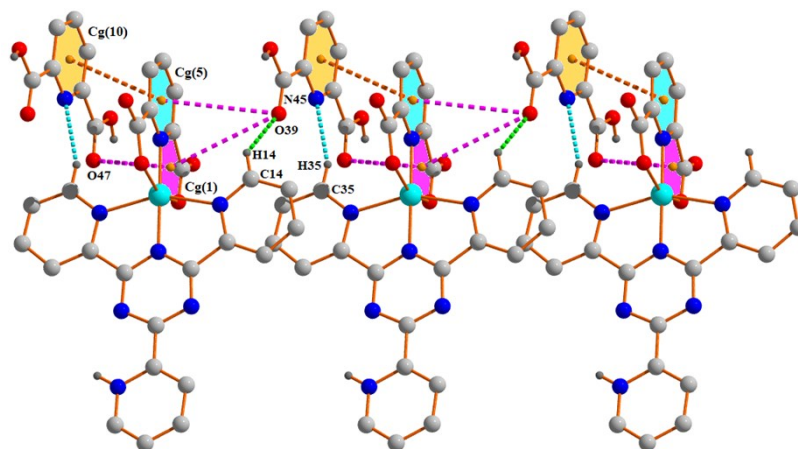

**Fig. S6** Propagation 1-D of polymeric chain through  $\pi \cdots \pi$  / lone pair  $\cdots \pi$  / hydrogen bonding interactions in complex **1** (other aromatic hydrogen atoms have been omitted for clarity).



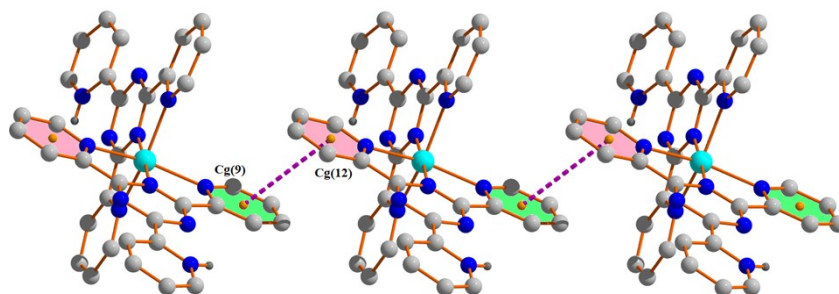

**Fig. S7** 1-D polymeric chain through a  $\pi \cdots \pi$  interaction in complex **2** (aromatic hydrogen atoms have been omitted for clarity).

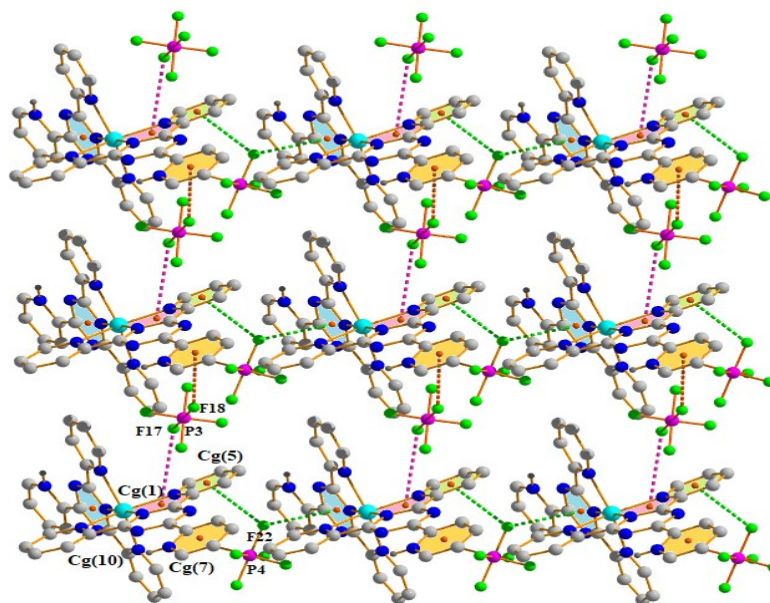

**Fig. S8** Perspective view of 2-D layer incorporating anion  $\cdots \pi$  and anion  $\cdots \pi^+$  interactions in complex **2** (aromatic hydrogen atoms have been omitted for clarity).

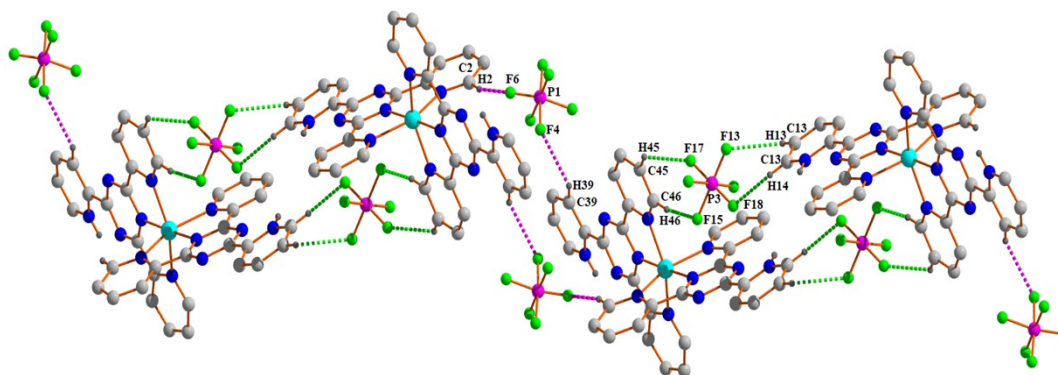

**Fig. S9** One-dimensional (1-D) zigzag polymeric chain through hydrogen bonding interactions in complex **2** (other aromatic hydrogen atoms have been omitted for clarity).

**Table S8** Device parameter for 1

| condition | on/off | conductivity $\delta$ (S cm <sup>-1</sup> ) | ideality factor $\eta$ | dv/dlnI Rs (k ohm) | H Rs (k ohm) | barrier height $\Phi_B$ | transit time $t \times 10^{-9}$ (s) | D $\times 10^{-6}$ | L <sub>D</sub> $\times 10^{-7}$ | Mobility $\mu_{\text{eff}} \times 10^{-5}$ (cm <sup>2</sup> V <sup>-1</sup> s <sup>-1</sup> ) |
|-----------|--------|---------------------------------------------|------------------------|--------------------|--------------|-------------------------|-------------------------------------|--------------------|---------------------------------|-----------------------------------------------------------------------------------------------|
| Dark      | 2.95   | $2.45 \times 10^{-3}$                       | 2.81                   | 9.63               | 9.40         | 0.64                    | 8.31                                | 3.69               | 2.476                           | 7.14                                                                                          |
| Light     | 31.31  | $6.06 \times 10^{-3}$                       | 1.79                   | 5.58               | 5.18         | 0.70                    | 6.3                                 | 18.45              | 2.584                           | 14.30                                                                                         |

**Table S9** Device parameter for 2

| condition | On/off | conductivity $\delta$ (S cm <sup>-1</sup> ) | ideality factor $\eta$ | dv/dlnI Rs (k ohm) | H Rs (k ohm) | barrier height $\Phi_B$ | transit time $t \times 10^{-9}$ (s) | D $\times 10^{-6}$ | L <sub>D</sub> $\times 10^{-7}$ | Mobility $\mu_{\text{eff}} \times 10^{-4}$ (cm <sup>2</sup> V <sup>-1</sup> s <sup>-1</sup> ) |
|-----------|--------|---------------------------------------------|------------------------|--------------------|--------------|-------------------------|-------------------------------------|--------------------|---------------------------------|-----------------------------------------------------------------------------------------------|
| Dark      | 31.21  | $1.54 \times 10^{-2}$                       | 2.53                   | 3.11               | 2.64         | 0.73                    | 7.2                                 | 8.25               | 3.447                           | 3.19                                                                                          |
| Light     | 54.93  | $3.24 \times 10^{-2}$                       | 1.44                   | 2.58               | 2.17         | 0.60                    | 5.7                                 | 13.86              | 3.976                           | 5.36                                                                                          |

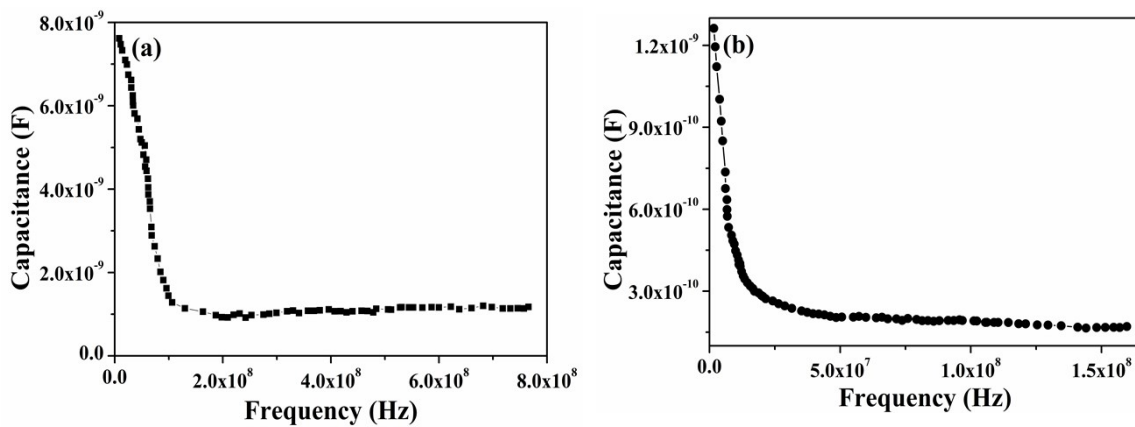

**Fig. S10** Capacitance vs. Frequency plot of (a) device 1 and (b) device 2

**Table 10** Conductivity data reported for single crystals of Ni-based complexes at room temperature

| Ni(II) complex                                                                                 | Electrical conductivity (S cm <sup>-1</sup> ) | Reference    |
|------------------------------------------------------------------------------------------------|-----------------------------------------------|--------------|
| [Ni <sub>2</sub> (C <sub>4</sub> N <sub>2</sub> H <sub>3</sub> S) <sub>4</sub> ] <sub>n</sub>  | 5×10 <sup>-3</sup>                            | (1)          |
| C <sub>20</sub> H <sub>10</sub> N <sub>4</sub> NiHg <sub>2</sub> S <sub>4</sub>                | 2.18×10 <sup>-10</sup>                        | (2)          |
| Ni <sub>2</sub> (C <sub>22</sub> H <sub>20</sub> N <sub>6</sub> O <sub>4</sub> ) <sub>n</sub>  | 2.15 ×10 <sup>-11</sup>                       | (3)          |
| C <sub>10</sub> H <sub>23</sub> N <sub>4</sub> O <sub>8</sub> SClNi                            | 2.14×10 <sup>-9</sup>                         | (4)          |
| C <sub>60</sub> H <sub>54</sub> Br <sub>4</sub> N <sub>4</sub> Ni <sub>2</sub> O <sub>13</sub> | 3.57×10 <sup>-4</sup>                         | (5)          |
| Ni(BzO <sub>4</sub> [16]octaeneN <sub>4</sub> )(ClO <sub>4</sub> ) <sub>2</sub>                | 6.97×10 <sup>-4</sup>                         | (6)          |
| C <sub>52</sub> H <sub>40</sub> F <sub>2</sub> N <sub>8</sub> NiS <sub>2</sub>                 | 9.81×10 <sup>-9</sup>                         | (7)          |
| C <sub>32</sub> H <sub>2</sub> N <sub>8</sub> NiClO <sub>9</sub> (Complex 1)                   | 6.0×10 <sup>-6</sup>                          | Present work |
| C <sub>36</sub> H <sub>28</sub> N <sub>12</sub> NiOF <sub>24</sub> P <sub>4</sub> (Complex 2)  | 3.24×10 <sup>-5</sup>                         | Present work |

## References

1. Y. Zhao, M. Hong, Y. Liang, R. Cao, W. Li, J. Weng and S. Lu, *Chem. Commun.*, 2001, 1020–1021.
2. N. Singh and V. K. Singh, *Transition Met. Chem.*, 2001, **26**, 435–439.
3. J. T. Makode, A. R. Yaul, S. G. Bhadange, and A. S. Aswar, *Russ. J. Inorg. Chem.*, 2009, **54**, 1372–1377.
4. M. S. Refat, I. M. ElDeen, M. A. Zein, A. M. A. Adam, M. I. Kobeasy, *Int. J. Electrochem. Sci.*, 2013, **8**, 9894–9917.
5. İ. Gönül, *Inorg. Chim. Acta*, 2019, **495**, 119027–119034.
6. M. E. Sánchez-Vergaraa, B. Molinab, A. Hernández-Garcíaa, J. R. Álvarez-Badaa, and R. Salcedoc, *Semiconductors*, 2020, **54**, 441–449.
7. U. M. Osman, S. Silvarajoo, K. H. Kamarudin, M. I. M. Tahir, H. C. Kwong, *J. Mol. Struct.*, 2021, **1223**, 128994–129003.
